# Supplementary material
Source: PubMed Central journal article supplement (PMC3263987)
Supplement: supp_ddr506_ddr506supp.pdf [file supp_ddr506_ddr506supp.pdf]

## **Supplemental Figures and Tables**

File includes:

1. Supplemental Table 1
2. Supplemental Figure Legends
3. Supplemental Figure 1
4. Supplemental Figure 2
5. Supplemental Figure 3
6. Supplemental Figure 4
7. Supplemental Figure 5
8. Supplemental Table 2

| <b>Line and<br/>subline name</b> | <b>Method used to<br/>generate subline</b> | <b>Passage<br/>analyzed</b> | <b>% nuclei with<br/>H3K27me3<br/>foci</b> |
|----------------------------------|--------------------------------------------|-----------------------------|--------------------------------------------|
| HSF-6                            | Start                                      | 57                          | 40%                                        |
| HSF-6 (1)                        | Colony pick                                | 61                          | 70%                                        |
| HSF-6 (2)                        | Colony pick                                | 61                          | 30%                                        |
| HSF-6 (3)                        | Colony pick                                | 61                          | 30%                                        |
| HSF-6 (4)                        | Colony pick                                | 61                          | 70%                                        |
| HSF-6 (5)                        | Colony pick                                | 61                          | 50%                                        |
| HSF-6 (6)                        | Colony pick                                | 61                          | 50%                                        |
| HSF-6 (7)                        | Colony pick                                | 61                          | 95%                                        |
| HSF-6 (8)                        | Colony pick                                | 61                          | 95%                                        |
| HSF-6 (9)                        | Colony pick                                | 61                          | 50%                                        |
| HSF-6 (10)                       | Colony pick                                | 61                          | 95%                                        |
| HSF-6 (S6)                       | Single cell                                | 64                          | 0%                                         |
| HSF-6 (S7)                       | Single cell                                | 64                          | 0%                                         |
| HSF-6 (S8)                       | Single cell                                | 64                          | 0%                                         |
| HSF-6 (S9)                       | Single cell                                | 64                          | 0%                                         |
| H9                               | Start                                      | 37                          | 36%                                        |
| H9 (1)                           | Colony pick                                | 41                          | 0%                                         |
| H9 (2)                           | Colony pick                                | 41                          | 0%                                         |
| H9 (3)                           | Colony pick                                | 41                          | 0%                                         |
| H9 (4)                           | Colony pick                                | 41                          | 0%                                         |
| H9 (5)                           | Colony pick                                | 41                          | 50%                                        |
| H9 (6)                           | Colony pick                                | 41                          | 50%                                        |
| H9 (7)                           | Colony pick                                | 41                          | 0%                                         |
| H9 (8)                           | Colony pick                                | 41                          | 0%                                         |
| H9 (9)                           | Colony pick                                | 41                          | 0%                                         |
| H9 (10)                          | Colony pick                                | 41                          | 0%                                         |
| HSF-6                            | Regular passaging                          | 61                          | 0%                                         |
| H9                               | Regular passaging                          | 41                          | 0%                                         |

Supplemental Table 1: Percentage of nuclei in HSF-6 and H9 lines and sublines containing a single focal dot of H3K27me3.

### **Supplemental Figure Legends:**

**Supplemental Figure 1:** Comparison of Cot 1/X chromosome FISH and H3K27me3/X chromosome FISH techniques for identifying XCI in female fibroblasts and hIPS21. **(A)** Female fibroblast nuclei stained with H3K27me3 and DAPI. Arrow indicates focal dot identified in n=328/328 nuclei **(B)** Female fibroblast demonstrating a single *XIST* focal dot in a DAPI stained nucleus indicating *XIST*-dependent XCI. **(C)** Cot1/X chromosome FISH of female fibroblasts, where one X chromosome is localized to a nuclear exclusion zone in n=18/18 nuclei (arrow). **(D)** H3K4me3/X chromosome FISH technique of female fibroblasts, one X chromosome localized to a nuclear exclusion zone in n=30/30 nuclei (arrow). **(E)** H3K4me3/X chromosome FISH of hIPS21 which was previously reported as exhibiting *XIST*-independent XCI in the self-renewing state shows one X chromosome to a nuclear exclusion zone (n=27 nuclei analyzed).

**Supplemental Figure 2:** Teratoma analysis in class III lines. **(A)** Teratomas were generated by transplantation into the testicles of immunocompromized mice. n= number of testicles that were transplanted. **(B)**. Representative image of endoderm, mesoderm and ectodermal lineages (arrow) identified in each of the tumors by histology.

**Supplemental Figure 3:** Karyotype and Flow cytometry of new UCLA hESC lines. **(A)** Karyotype was performed by Cell Line Genetics at the passage (p) indicated for all six hESC lines. **(B)** Flow cytometry was performed to evaluate TRA-1-81 and SSEA4 positive cells in all six hESC lines at the passage (p) indicated.

**Supplemental Figure 4:** Teratomas were generated from the six new UCLA lines as indicated. All lines generated teratomas with evidence of ectoderm, mesoderm and endoderm as shown in the representative picture. In UCLA5 n=4 replicates generated tumors, however n=2/4 developed cystic tumors with no solid regions for diagnosis of teratoma and n=2/4 developed solid tumors where representative lineages from ectoderm, endoderm and mesoderm could be identified. n=number of testicles transplanted.

**Supplemental Figure 5:** Images of the human blastocysts used to generate UCLA1-6 hESC lines. Images were taken within 24 hours of plating on MEFs

Human fibroblast

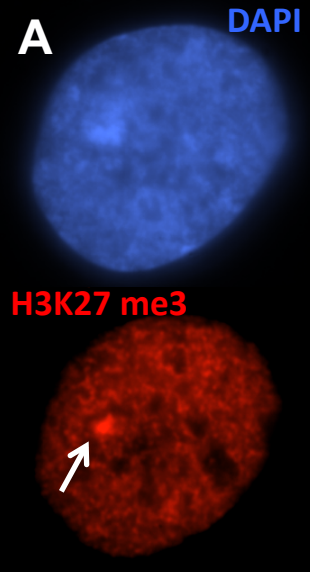

Human fibroblast

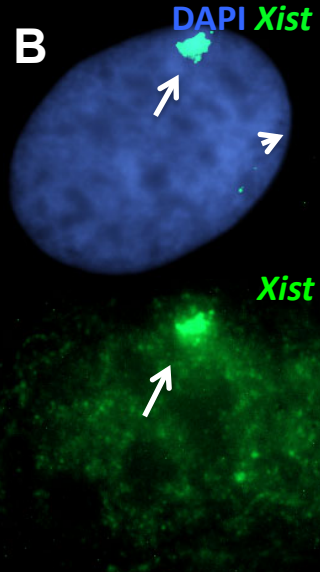

Human fibroblast

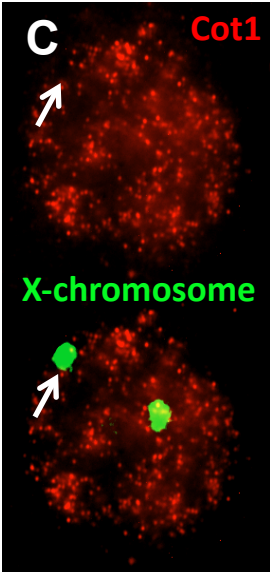

Human fibroblast

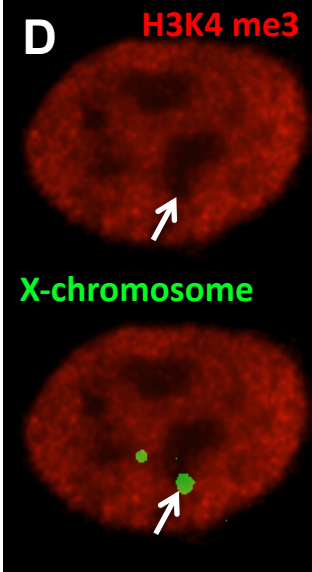

hiPS21

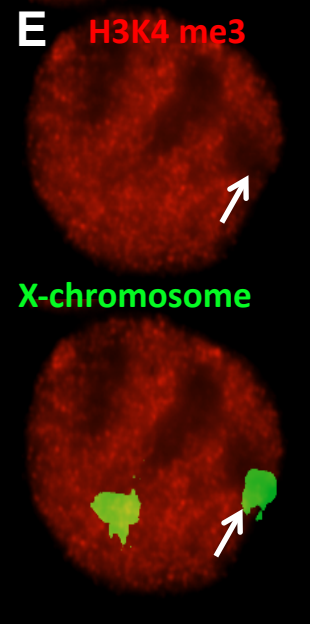

Supplemental figure 1

**A**

| <b>Line and Subline name</b> | <b>Differentiation in vivo</b> | <b>Result</b> |
|------------------------------|--------------------------------|---------------|
| HSF-6 (S7)                   | SCID-Beige testicles           | 4/4 teratomas |
| HSF-6 (S8)                   | SCID-Beige testicles           | 4/4 teratomas |
| HSF-6 (S9)                   | SCID-Beige testicles           | 4/4 teratomas |
| HSF-6                        | SCID-Beige testicles           | 4/4 teratomas |
| H9 (7)                       | SCID-Beige testicles           | 4/4 teratomas |
| H9 (8)                       | SCID-Beige testicles           | 4/4 teratomas |
| H9 (9)                       | SCID-Beige testicles           | 4/4 teratomas |
| H9                           | SCID-Beige testicles           | 4/4 teratomas |

Table: Teratomas generated from class III hESC lines and sublines

**B**

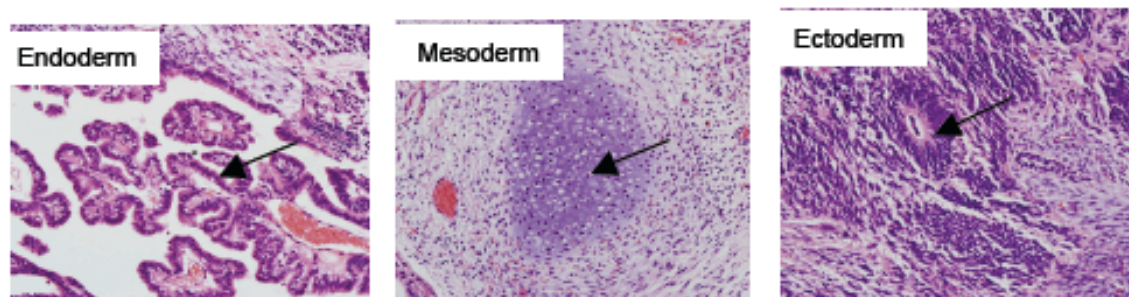

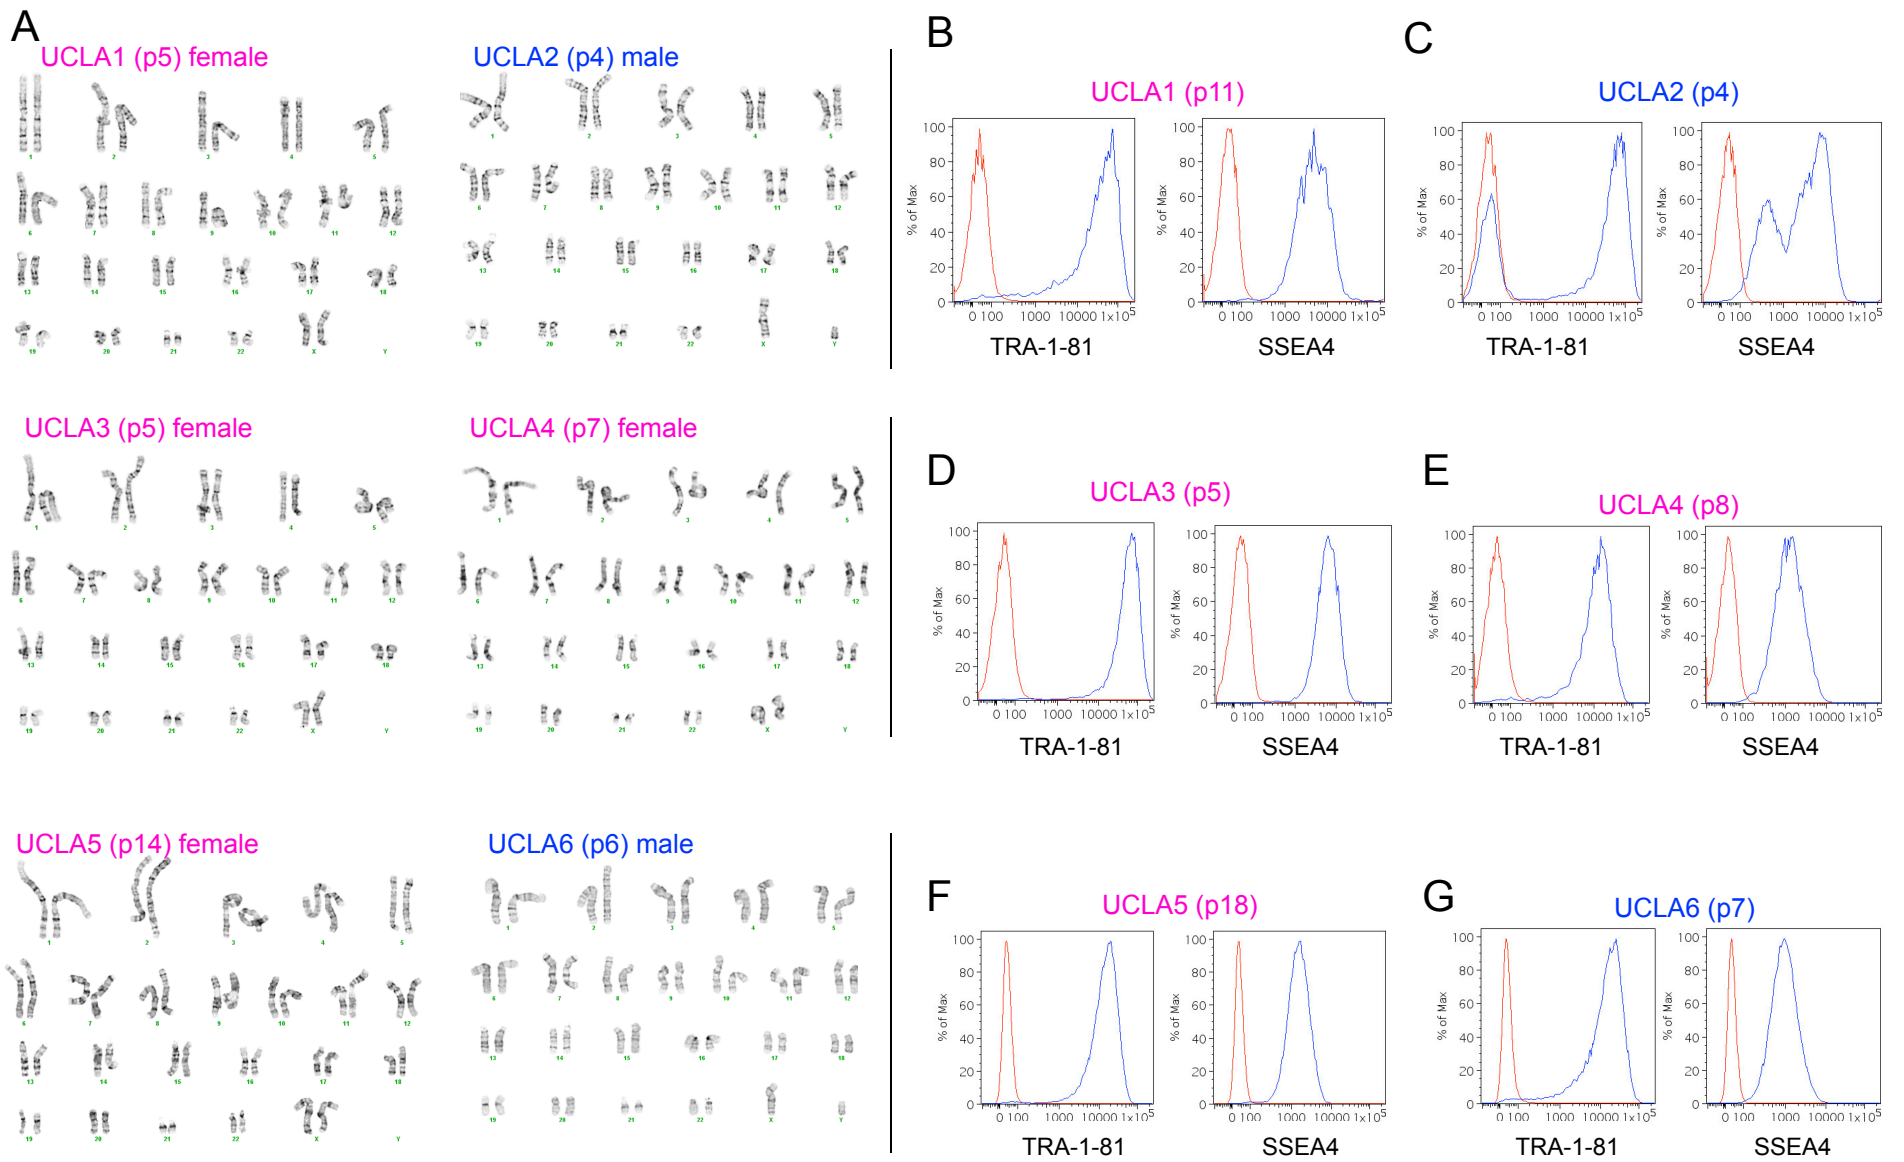

Supplemental Figure 3

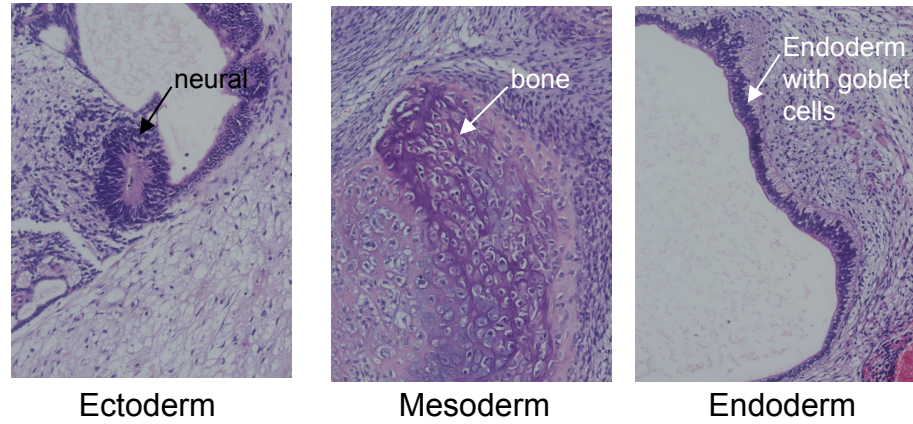

| Cell Line | Positive | Positive | Positive |
|-----------|----------|----------|----------|
| UCLA1     | n=4      | n=4      | n=4      |
| UCLA2     | n=2      | n=2      | n=2      |
| UCLA3     | n=2      | n=2      | n=2      |
| UCLA4     | n=2      | n=2      | n=2      |
| UCLA5*    | n=2/4    | n=2/4    | n=2/4    |
| UCLA6     | n=4      | n=4      | n=4      |



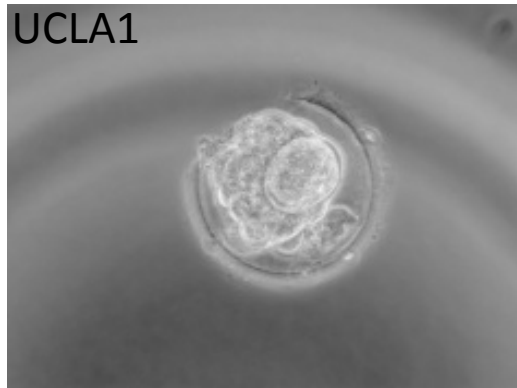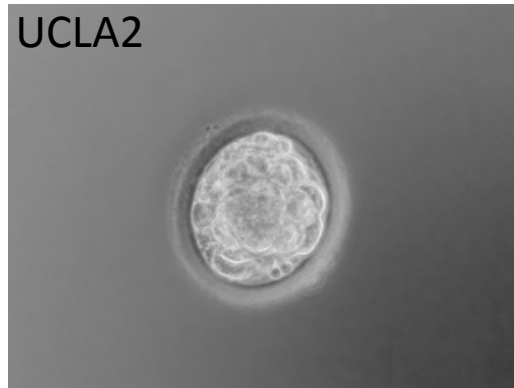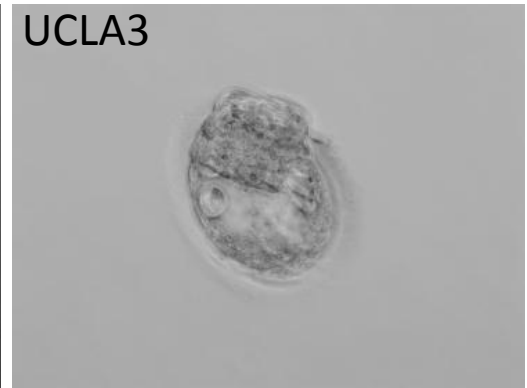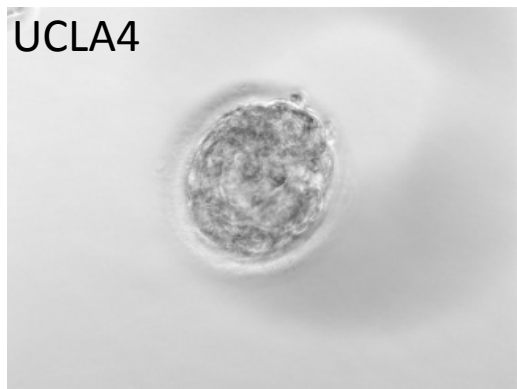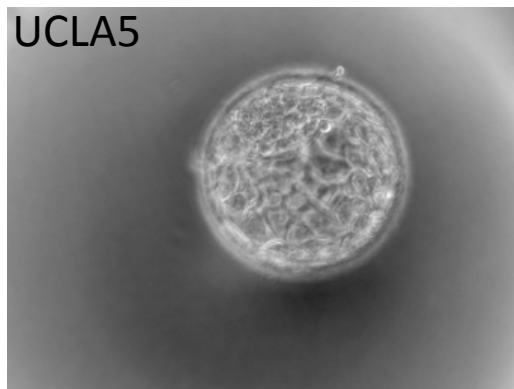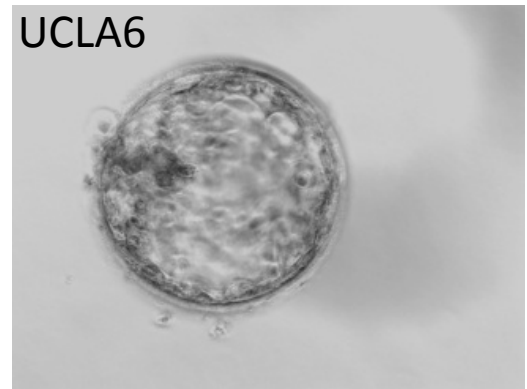

Supplemental Table 2: List of 170 differentially expressed gene accession numbers comparing HSF-6 (8) cultured with and without B+D. Red (negative numbers) indicate downregulated in B+D

| probe set    | gene                                                                                 | Accession | EntrezGene      | Description         | fold change | t statistic | P value |
|--------------|--------------------------------------------------------------------------------------|-----------|-----------------|---------------------|-------------|-------------|---------|
| 237911_at    | Transcribed locus                                                                    | BF057809  |                 | Hs.197683.0         |             | 51.77       | 13.268  |
| 235557_at    | LOC150763: hypothetical protein LOC150763                                            | AW082827  |                 | 150763 Hs.146084.0  |             | 48.22       | 9.522   |
| 224997_x_at  | H19: H19, imprinted maternally expressed untranslated mRNA                           | AL575306  |                 | 283120 Hs.279525.0  |             | 36.14       | 12.681  |
| 39318_at     | TCL1A: T-cell leukemia/lymphoma 1A                                                   | X82240    |                 | 8115 4856700_RC     |             | 20.18       | 13.751  |
| 206994_at    | CST4: cystatin S                                                                     | NM_001899 |                 | 1472 g4503108       |             | 20.02       | 15.593  |
| 242516_x_at  | MGC27016: hypothetical protein MGC27016                                              | AA934358  |                 | 166863 Hs.126987.0  |             | 16.27       | 13.826  |
| 206224_at    | CST1: cystatin SN                                                                    | NM_001898 |                 | 1469 g4503102       |             | 12.76       | 14.168  |
| 228949_at    | GPR177: G protein-coupled receptor 177                                               | AL534095  |                 | 79971 Hs.250746.1   |             | 10.63       | 8.178   |
| 221958_s_at  | GPR177: G protein-coupled receptor 177                                               | AA775681  |                 | 79971 Hs.250746.2   |             | 10.08       | 16.255  |
| 208555_x_at  | CST2: cystatin SA                                                                    | NM_001322 |                 | 1470 g4503104       |             | 8.63        | 11.605  |
| 211276_at    | TCEAL2: transcription elongation factor A (SII)-like 2                               | AF063606  |                 | 140597 g12002041    |             | 8.47        | 8.414   |
| 220535_at    | FAM90A1: family with sequence similarity 90, member A1                               | NM_018088 |                 | 55138 g8922410      |             | 7.9         | 9.285   |
| 221916_at    | NEFL: neurofilament, light polypeptide 68kDa                                         | BF055311  |                 | 4747 Hs.302689.1    |             | 7.68        | 8.827   |
| 209392_at    | ENPP2: ectonucleotide pyrophosphatase/phosphodiesterase 2 (autotaxin)                | L35594    |                 | 5168 g537905        |             | 7.41        | 9.384   |
| 237552_at    | CDNA clone IMAGE:4667929                                                             | BF056473  |                 | Hs.197042.0         |             | 7.31        | 5.37    |
| 215356_at    | ECAT8: ES cell associated transcript 8                                               | AK023134  |                 | 91646 Hs.277014.0   |             | 6.29        | 10.731  |
| 221805_at    | NEFL: neurofilament, light polypeptide 68kDa                                         | AL537457  |                 | 4747 Hs.211584.0    |             | 6.08        | 9.162   |
| 231460_at    | Transcribed locus                                                                    | AI702438  |                 | Hs.145533.0         |             | 6.08        | 11.386  |
| 214603_at    | MAGEA2 /// MAGEA2B: melanoma antigen family A, 2 /// melanoma antigen family         | U26271    | 266740 /// 4101 | Hs.36980.0          |             | 5.98        | 6.981   |
| 210770_s_at  | CACNA1A: calcium channel, voltage-dependent, P/Q type, alpha 1A subunit              | AF004884  |                 | 773 g2213912        |             | 5.34        | 7.935   |
| 221690_s_at  | NLRP2: NLR family, pyrin domain containing 2                                         | AF298547  |                 | 55655 g10198206     |             | 5.16        | 14.339  |
| 210839_s_at  | ENPP2: ectonucleotide pyrophosphatase/phosphodiesterase 2 (autotaxin)                | D45421    |                 | 5168 g662289        |             | 4.82        | 11.001  |
| 221558_s_at  | LEF1: lymphoid enhancer-binding factor 1                                             | AF288571  |                 | 51176 g9858157      |             | 4.77        | 6.857   |
| 228950_s_at  | GPR177: G protein-coupled receptor 177                                               | AL534095  |                 | 79971 Hs.250746.1   |             | 4.42        | 10.121  |
| 1564413_at   | Hs.2.396985.1                                                                        | AK093435  |                 | Hs.2.396985.1       |             | 4.34        | 10.029  |
| 209604_s_at  | GATA3: GATA binding protein 3                                                        | BC003070  |                 | 2625 g13111765      |             | 4.13        | 7.311   |
| 205524_s_at  | HAPLN1: hyaluronan and proteoglycan link protein 1                                   | NM_001884 |                 | 1404 g4503052       |             | 4.08        | 7.203   |
| 213238_at    | ATP10D: ATPase, Class V, type 10D                                                    | AI478147  |                 | 57205 Hs.173540.0   |             | 4           | 7.497   |
| 213258_at    | TFPI: tissue factor pathway inhibitor (lipoprotein-associated coagulation inhibitor) | BF511231  |                 | 7035 Hs.288582.0    |             | 3.68        | 6.507   |
| 206390_x_at  | PF4: platelet factor 4 (chemokine (C-X-C motif) ligand 4)                            | NM_002619 |                 | 5196 g4505732       |             | 3.61        | 5.449   |
| 205710_at    | LRP2: low density lipoprotein-related protein 2                                      | NM_004525 |                 | 4036 g6806918       |             | 3.51        | 6.595   |
| 213624_at    | SMPDL3A: sphingomyelin phosphodiesterase, acid-like 3A                               | AA873600  |                 | 10924 Hs.42945.0    |             | 3.42        | 9.857   |
| 223422_s_at  | ARHGAP24: Rho GTPase activating protein 24                                           | AI743534  |                 | 83478 Hs.93589.0    |             | 3.36        | 8.505   |
| 210664_s_at  | TFPI: tissue factor pathway inhibitor (lipoprotein-associated coagulation inhibitor) | AF021834  |                 | 7035 g4103170       |             | 3.29        | 6.72    |
| 212234_at    | ASXL1: additional sex combs like 1 (Drosophila)                                      | AL034550  |                 | 171023 Hs.3686.0    |             | 3.23        | 11.492  |
| 209676_at    | TFPI: tissue factor pathway inhibitor (lipoprotein-associated coagulation inhibitor) | J03225    |                 | 7035 g180545        |             | 3.21        | 5.783   |
| 209197_at    | SYT11: synaptotagmin XI                                                              | AA626780  |                 | 23208 Hs.74554.0    |             | 3.11        | 8.108   |
| 203881_s_at  | DMD: dystrophin (muscular dystrophy, Duchenne and Becker types)                      | NM_004010 |                 | 1756 g5032314       |             | 3.05        | 15.931  |
| 218445_at    | H2AFY2: H2A histone family, member Y2                                                | NM_018649 |                 | 55506 g8923919      |             | 2.9         | 8.89    |
| 209280_at    | MRC2: mannose receptor, C type 2                                                     | U58856    |                 | 9902 g2209262       |             | 2.88        | 5.17    |
| 232191_at    | C21orf105: chromosome 21 open reading frame 105                                      | BC005107  |                 | 90625 Hs.143375.0   |             | 2.88        | 5.927   |
| 202273_at    | PDGFRB: platelet-derived growth factor receptor, beta polypeptide                    | NM_002609 |                 | 5159 g4505682       |             | 2.87        | 6.67    |
| 204689_at    | HHEX: hematopoietically expressed homeobox                                           | NM_001529 |                 | 3087 g10835016      |             | 2.85        | 11.144  |
| 205893_at    | NLG1: neuroligin 1                                                                   | NM_014932 |                 | 22871 g7662469      |             | 2.7         | 5.768   |
| 201278_at    | DAB2: disabled homolog 2, mitogen-responsive phosphoprotein (Drosophila)             | N21202    |                 | 1601 Hs.81988.0     |             | 2.57        | 6.003   |
| 204073_s_at  | C11orf9: chromosome 11 open reading frame 9                                          | NM_013279 |                 | 745 g7019334        |             | 2.57        | 6.604   |
| 238467_at    | CDNA FLI41419 fis, clone BRHIP2002339                                                | BE892293  |                 | Hs.127121.0         |             | 2.56        | 8.438   |
| 226113_at    | ZNF436: zinc finger protein 436                                                      | AB051497  |                 | 80818 Hs.293798.0   |             | 2.54        | 4.81    |
| 218297_at    | C10orf97: chromosome 10 open reading frame 97                                        | NM_024948 |                 | 80013 g13376430     |             | 2.53        | 6.486   |
| 215933_s_at  | HHEX: hematopoietically expressed homeobox                                           | Z21533    |                 | 3087 Hs.118651.1    |             | 2.5         | 6.864   |
| 212741_at    | MAOA: monoamine oxidase A                                                            | AA923354  |                 | 4128 Hs.183109.1    |             | 2.48        | 4.758   |
| 226756_at    | CDNA FLI25556 fis, clone JTH02629                                                    | AA191741  |                 | Hs.29692.0          |             | 2.45        | 6.199   |
| 232636_at    | SLITRK4: SLIT and NTRK-like family, member 4                                         | AL080239  |                 | 139065 Hs.272284.0  |             | 2.45        | 8.746   |
| 226725_at    | SLFN5: Schlafen family member 5                                                      | AI435399  |                 | 162394 Hs.14691.0   |             | 2.39        | 6.171   |
| 207826_s_at  | ID3: inhibitor of DNA binding 3, dominant negative helix-loop-helix protein          | NM_002167 |                 | 3399 g10835060      |             | 2.38        | 10.636  |
| 212830_at    | MEGF9: multiple EGF-like-domains 9                                                   | W68084    |                 | 1955 Hs.5599.0      |             | 2.29        | 8.605   |
| 225855_at    | EPB41L5: erythrocyte membrane protein band 4.1 like 5                                | AB046768  |                 | 57669 Hs.6728.0     |             | 2.26        | 5.822   |
| 236840_at    | C12orf56: chromosome 12 open reading frame 56                                        | AI522132  |                 | 115749 Hs.28700.0   |             | 2.25        | 7.389   |
| 209589_s_at  | EPHB2: EPH receptor B2                                                               | AF025304  |                 | 2048 g2739055       |             | 2.23        | 5.836   |
| 227290_at    | CDNA FLI13598 fis, clone PLACE1009921                                                | AU157881  |                 | Hs.60257.0          |             | 2.23        | 11.943  |
| 203295_s_at  | ATP1A2: ATPase, Na+/K+ transporting, alpha 2 (+) polypeptide                         | AW440492  |                 | 477 Hs.34114.0      |             | 2.2         | 8.022   |
| 202998_s_at  | LOXL2: lysyl oxidase-like 2                                                          | NM_002318 |                 | 4017 g4505010       |             | 2.18        | 4.852   |
| 224565_at    | TncRNA: trophoblast-derived noncoding RNA                                            | BE675516  |                 | 283131 Hs.240443.0  |             | 2.16        | 5.607   |
| 212930_at    | ATP2B1: ATPase, Ca++ transporting, plasma membrane 1                                 | AW576457  |                 | 490 Hs.20952.0      |             | 2.13        | 9.492   |
| 209530_at    | CACNB3: calcium channel, voltage-dependent, beta 3 subunit                           | U07139    |                 | 784 g463890         |             | 2.1         | 5.509   |
| 202007_at    | NID1: nidogen 1                                                                      | BF940043  |                 | 4811 Hs.62041.0     |             | 2.09        | 6.877   |
| 236016_at    | CDNA FLI38419 fis, clone FEBRA2009846                                                | AI702962  |                 | Hs.127211.0         |             | 2.09        | 5.794   |
| 227911_at    | ARHGAP28: Rho GTPase activating protein 28                                           | AI935647  |                 | 79822 Hs.183114.0   |             | 2.06        | 5.551   |
| 1556361_s_at | ANKRD13C: ankyrin repeat domain 13C                                                  | BC016937  |                 | 81573 Hs.2.398143.1 |             | 2.06        | 7.042   |
| 205080_at    | RARB: retinoic acid receptor, beta                                                   | NM_000965 |                 | 5915 g4506420       |             | 2.04        | 6.041   |
| 213785_at    | IPO9: importin 9                                                                     | AW269792  |                 | 55705 Hs.5010.0     |             | 2.02        | 5.093   |
| 222653_at    | PNPO: pyridoxamine 5'-phosphate oxidase                                              | AA005137  |                 | 55163 Hs.267963.0   |             | 2.01        | 5.355   |
| 224826_at    | RP5-1022P6.2: hypothetical protein KIAA1434                                          | AK001947  |                 | 56261 Hs.171917.1   |             | 2.01        | 11.6    |
| 202008_s_at  | NID1: nidogen 1                                                                      | NM_002508 |                 | 4811 g4505394       |             | 2           | 5.931   |
| 226625_at    | Hs.79059.1                                                                           | AW193698  |                 | Hs.79059.1          |             | 1.98        | 6.452   |
| 221139_s_at  | CSAD: cysteine sulfonic acid decarboxylase                                           | NM_015989 |                 | 51380 g7705333      |             | 1.97        | 7.809   |
| 235904_at    | UGT3A1: UDP glucosyltransferase 3 family, polypeptide A1                             | AL135700  |                 | 133688 Hs.132501.0  |             | 1.96        | 6.248   |
| 208073_x_at  | TTC3: tetratricopeptide repeat domain 3                                              | NM_003316 |                 | 7267 g10835036      |             | 1.94        | 6.283   |
| 201539_s_at  | FHL1: four and a half LIM domains 1                                                  | U29538    |                 | 2273 g2078479       |             | 1.93        | 4.711   |
| 210645_s_at  | TTC3: tetratricopeptide repeat domain 3                                              | D83077    |                 | 7267 g1304131       |             | 1.93        | 6.601   |
| 213333_at    | MDH2: malate dehydrogenase 2, NAD (mitochondrial)                                    | AL520774  |                 | 4191 Hs.111076.1    |             | 1.93        | 7.806   |
| 204483_at    | ENO3: enolase 3 (beta, muscle)                                                       | NM_001976 |                 | 2027 g4503572       |             | 1.92        | 6.226   |
| 201473_at    | JUNB: jun B proto-oncogene                                                           | NM_002229 |                 | 3726 g4504808       |             | 1.88        | 6.87    |
| 201540_at    | FHL1: four and a half LIM domains 1                                                  | NM_001449 |                 | 2273 g4503720       |             | 1.87        | 5.129   |
| 205862_at    | GREB1: GREB1 protein                                                                 | NM_014668 |                 | 9687 g7662187       |             | 1.87        | 8.585   |
| 219952_s_at  | MCOLN1: mucopolin 1                                                                  | NM_020533 |                 | 57192 g10092596     |             | 1.86        | 6.729   |
| 222749_at    | SUFU: suppressor of fused homolog (Drosophila)                                       | AF159447  |                 | 51684 g6689893      |             | 1.86        | 5.39    |
| 227120_at    | FOXP4: forkhead box P4                                                               | AI673539  |                 | 116113 Hs.199316.0  |             | 1.84        | 5.364   |
| 232202_at    | CDNA: FLI21274 fis, clone COL01781                                                   | AK024927  |                 | Hs.152423.0         |             | 1.84        | 7.379   |
| 235940_at    | C9orf64: chromosome 9 open reading frame 64                                          | AW983691  |                 | 84267 Hs.145809.0   |             | 1.84        | 5.978   |
| 215594_at    | PTR2 mRNA for repetitive sequence                                                    | AU148611  |                 | Hs.296832.0         |             | 1.83        | 7.515   |
| 227860_at    | CPXM1: carboxypeptidase X (M14 family), member 1                                     | NM_019609 |                 | 56265 Hs.177536.0   |             | 1.82        | 8.79    |

|              |                                                                                       |           |                    |       |         |          |
|--------------|---------------------------------------------------------------------------------------|-----------|--------------------|-------|---------|----------|
| 218208_at    | PQLC1: PQ loop repeat containing 1                                                    | NM_025078 | 80148 g13376629    | 1.8   | 5.394   | 0.005714 |
| 224593_at    | ZNF664: zinc finger protein 664                                                       | BE965646  | 144348 Hs.61976.0  | 1.8   | 5.557   | 0.009259 |
| 205347_s_at  | TMSL8: thymosin-like 8                                                                | NM_021992 | 11013 g11496272    | 1.77  | 6.235   | 0.003572 |
| 210512_s_at  | VEGFA: vascular endothelial growth factor A                                           | AF022375  | 7422 g3719220      | 1.77  | 4.947   | 0.007883 |
| 201727_s_at  | ELAVL1: ELAV (embryonic lethal, abnormal vision, Drosophila)-like 1 (Hu antigen R)    | NM_001419 | 1994 g4503550      | 1.76  | 5.822   | 0.004335 |
| 226868_at    | GLT8D3: glycosyltransferase 8 domain containing 3                                     | BF977231  | 283464 Hs.173044.0 | 1.75  | 7.52    | 0.002678 |
| 201200_at    | CREG1: cellular repressor of E1A-stimulated genes 1                                   | NM_003851 | 8804 g4503036      | 1.74  | 6.086   | 0.004667 |
| 201650_at    | KRT19: keratin 19                                                                     | NM_002276 | 3880 g4504916      | 1.74  | 6.95    | 0.003423 |
| 202815_s_at  | HEXIM1: hexamethylene bis-acetamide inducible 1                                       | NM_006460 | 10614 g5453681     | 1.74  | 8.447   | 0.001632 |
| 207551_s_at  | MSL3L1: male-specific lethal 3-like 1 (Drosophila)                                    | NM_006800 | 10943 g5803103     | 1.74  | 5.316   | 0.006178 |
| 212195_at    | IL6ST: Interleukin 6 signal transducer (gp130, oncostatin M receptor)                 | AL049265  | 3572 Hs.71968.0    | 1.73  | 6.903   | 0.002358 |
| 226786_at    | RFX1: regulatory factor X, 1 (influences HLA class II expression)                     | BF507952  | 5989 Hs.73677.0    | 1.73  | 9.595   | 0.001692 |
| 213135_at    | TIAM1: T-cell lymphoma invasion and metastasis 1                                      | U90902    | 7074 Hs.82141.0    | 1.72  | 6.625   | 0.00273  |
| 202083_s_at  | SEC14L1: SEC14-like 1 (S. cerevisiae)                                                 | AI017770  | 6397 Hs.75232.0    | 1.71  | 5.312   | 0.007319 |
| 202743_at    | PIK3R3: phosphoinositide-3-kinase, regulatory subunit 3 (p55, gamma)                  | BE622627  | 8503 Hs.88051.0    | 1.71  | 6.49    | 0.003045 |
| 41387_r_at   | JMJD3: jumonji domain containing 3                                                    | AB002344  | 23135 4861272_RC   | 1.7   | 5.309   | 0.006103 |
| 204944_at    | PTPRG: protein tyrosine phosphatase, receptor type, G                                 | NM_002841 | 5793 g11386168     | 1.69  | 4.802   | 0.009016 |
| 213146_at    | JMJD3: jumonji domain containing 3                                                    | AA521267  | 23135 Hs.103915.0  | 1.69  | 6.114   | 0.004094 |
| 202931_x_at  | BIN1: bridging integrator 1                                                           | NM_004305 | 274 g4757747       | 1.68  | 5.437   | 0.005553 |
| 225543_at    | GTF3C4: general transcription factor IIIC, polypeptide 4, 90kDa                       | BF434224  | 9329 Hs.21734.0    | 1.68  | 5.626   | 0.001663 |
| 225864_at    | FAM84B: family with sequence similarity 84, member B                                  | AL039862  | 157638 Hs.49136.0  | 1.68  | 12.45   | 0.000254 |
| 235520_at    | SUHW3: suppressor of hairy wing homolog 3 (Drosophila)                                | AA805654  | 55609 Hs.121668.0  | 1.68  | 11.296  | 0.000933 |
| 212980_at    | USP34: ubiquitin specific peptidase 34                                                | AL050376  | 9736 Hs.322645.0   | 1.66  | 4.865   | 0.009106 |
| 226713_at    | CCDC50: coiled-coil domain containing 50                                              | AI247881  | 152137 Hs.10198.0  | 1.66  | 5.692   | 0.005566 |
| 211107_s_at  | AURKC: aurora kinase C                                                                | AB017332  | 6795 g4521232      | 1.64  | 5.219   | 0.00644  |
| 202447_at    | DECR1: 2,4-dienoyl CoA reductase 1, mitochondrial                                     | NM_001359 | 1666 g4503300      | 1.63  | 6.51    | 0.005614 |
| 226715_at    | FOXK1: forkhead box K1                                                                | AW007319  | 221937 Hs.11556.0  | 1.63  | 7.096   | 0.005404 |
| 227559_at    | Hs.5232.1                                                                             | ALS21129  | Hs.5232.1          | 1.63  | 5.121   | 0.009701 |
| 223043_at    | TMEM85: transmembrane protein 85                                                      | AF151018  | 51234 g7106757     | 1.62  | 9.041   | 0.00083  |
| 200720_s_at  | ACTR1A: ARP1 actin-related protein 1 homolog A, contractin alpha (yeast)              | ALS32341  | 10121 Hs.153961.0  | 1.61  | 6.856   | 0.002893 |
| 218913_s_at  | GMP1: GEM interacting protein                                                         | NM_016573 | 51291 g7706106     | 1.61  | 5.549   | 0.007898 |
| 224374_s_at  | EMILIN2: elastin microfibril interfacer 2                                             | AF270513  | 84034 g13661555    | 1.61  | 6.103   | 0.00419  |
| 225617_at    | ODF2: outer dense fiber of sperm tails 2                                              | AL138382  | 4957 Hs.129055.2   | 1.61  | 6.197   | 0.003449 |
| 41386_i_at   | JMJD3: jumonji domain containing 3                                                    | AB002344  | 23135 4861272_RC   | 1.6   | 7.018   | 0.002316 |
| 208112_x_at  | EHD1: EH-domain containing 1                                                          | NM_006795 | 10938 g5803008     | 1.59  | 6.513   | 0.002872 |
| 211980_at    | COL4A1: collagen, type IV, alpha 1                                                    | AI922605  | 1282 Hs.119129.0   | 1.59  | 5.587   | 0.005114 |
| 223547_at    | C14orf100: chromosome 14 open reading frame 100                                       | AL038769  | 15528 Hs.170219.0  | 1.58  | 8.087   | 0.001305 |
| 212484_at    | FAM89B: family with sequence similarity 89, member B                                  | BF974389  | 23265 Hs.18686.0   | 1.57  | 6.076   | 0.004273 |
| 221954_at    | C20orf111: Chromosome 20 open reading frame 111                                       | AA160474  | 51526 Hs.75798.1   | 1.57  | 8.226   | 0.005339 |
| 1568629_s_at | PIK3R2: phosphoinositide-3-kinase, regulatory subunit 2 (p85 beta)                    | BC033311  | 5296 Hs2.390523.1  | 1.57  | 6.565   | 0.003144 |
| 205823_at    | RGS12: regulator of G-protein signaling 12                                            | AI824113  | 6002 Hs.78281.0    | 1.56  | 6.326   | 0.005412 |
| 238041_at    | Transcribed locus                                                                     | AA151712  | Hs.82572.1         | 1.56  | 6.035   | 0.007326 |
| 203329_at    | PTPRM: protein tyrosine phosphatase, receptor type, M                                 | NM_002845 | 5797 g4506318      | 1.55  | 6.983   | 0.002561 |
| 203943_at    | KIF3B: kinesin family member 3B                                                       | NM_004798 | 9371 g4758645      | 1.54  | 5.075   | 0.007109 |
| 209039_x_at  | EHD1: EH-domain containing 1                                                          | AF001434  | 10938 g2529706     | 1.54  | 6.304   | 0.003255 |
| 218853_s_at  | MOSPD1: motile sperm domain containing 1                                              | NM_019556 | 56180 g9506542     | 1.54  | 5.186   | 0.00701  |
| 224996_at    | CDNA FLJ39064 fis, clone NT2RP7014583                                                 | N30209    | Hs.332422.0        | 1.54  | 5.407   | 0.0059   |
| 205406_s_at  | SPA17: sperm autoantigenic protein 17                                                 | NM_017425 | 53340 g8394342     | 1.53  | 5.112   | 0.006931 |
| 222221_x_at  | EHD1: EH-domain containing 1                                                          | AY007161  | 10938 Hs.155119.2  | 1.53  | 7.118   | 0.002215 |
| 205002_at    | AHDC1: AT hook, DNA binding motif, containing 1                                       | NM_015699 | 27245 g7661559     | 1.52  | 5.419   | 0.007801 |
| 218699_at    | RAB7L1: RAB7, member RAS oncogene family-like 1                                       | BG338251  | 8934 Hs.115325.0   | 1.52  | 5.718   | 0.005165 |
| 226077_at    | RNF145: ring finger protein 145                                                       | AL539442  | 153830 Hs.104893.0 | 1.52  | 12.745  | 0.000303 |
| 212905_at    | CSTF2T: cleavage stimulation factor, 3' pre-RNA, subunit 2, 64kDa, tau variant        | AI872408  | 23283 Hs.21992.1   | 1.5   | 5.179   | 0.008063 |
| 227373_at    | ATXN1L: ataxin 1-like                                                                 | AW299653  | 342371 Hs.20787.0  | 1.5   | 5.923   | 0.004382 |
| 227656_at    | C6orf70: chromosome 6 open reading frame 70                                           | AW968493  | 55780 Hs.47546.0   | 1.5   | 5.761   | 0.004509 |
| 202005_at    | ST14: suppression of tumorigenicity 14 (colon carcinoma)                              | NM_021978 | 6768 g11415039     | -1.58 | -5.331  | 0.007794 |
| 220615_s_at  | MLSTD1: male sterility domain containing 1                                            | NM_018099 | 55711 g8922433     | -1.63 | -6.496  | 0.003841 |
| 209615_s_at  | PAK1: p21/Cdc42/Rac1-activated kinase 1 (STE20 homolog, yeast)                        | U51120    | 5058 g1256421      | -1.67 | -14.176 | 0.000237 |
| 213010_at    | PRKCDBP: protein kinase C, delta binding protein                                      | AI088622  | 112464 Hs.85181.1  | -1.7  | -5.468  | 0.007638 |
| 219073_s_at  | OSBPL10: oxysterol binding protein-like 10                                            | NM_017784 | 114884 g8923336    | -1.71 | -5.375  | 0.006349 |
| 205229_s_at  | COCH: coagulation factor C homolog, cochlin (Limulus polyphemus)                      | AA669336  | 1690 Hs.21016.0    | -1.77 | -8.122  | 0.001592 |
| 201058_s_at  | MYL9: myosin, light chain 9, regulatory                                               | NM_006097 | 10398 g5174602     | -1.83 | -6.453  | 0.00347  |
| 210999_s_at  | GRB10: growth factor receptor-bound protein 10                                        | U66065    | 2887 g1518100      | -1.83 | -10.351 | 0.00074  |
| 226370_at    | KLHL15: kelch-like 15 (Drosophila)                                                    | BG149487  | 80311 Hs.61603.0   | -1.89 | -6.302  | 0.004331 |
| 226913_s_at  | SOX8: SRY (sex determining region Y)-box 8                                            | BF527050  | 30812 Hs.243678.0  | -1.98 | -5.549  | 0.005264 |
| 216905_s_at  | ST14: suppression of tumorigenicity 14 (colon carcinoma)                              | U20428    | 6768 Hs.56937.1    | -2    | -7.114  | 0.005012 |
| 1554242_a_at | COCH: coagulation factor C homolog, cochlin (Limulus polyphemus)                      | BC007230  | 1690 Hs2.21016.2   | -2.02 | -7.047  | 0.002937 |
| 232553_at    | PCYT1B: phosphate cytidylyltransferase 1, choline, beta                               | AI857508  | 9468 Hs.212482.0   | -2.08 | -4.915  | 0.008033 |
| 219032_x_at  | OPN3: opsin 3 (encephalopsin, panopsin)                                               | NM_014322 | 23596 g7657070     | -2.1  | -7.58   | 0.00307  |
| 235649_at    | ADAMTS8: ADAM metalloproteinase with thrombospondin type 1 motif, 8                   | AW207389  | 11095 Hs.126758.0  | -2.25 | -7.094  | 0.002162 |
| 227846_at    | GPR176: G protein-coupled receptor 176                                                | AA526584  | 11245 Hs.55144.0   | -2.38 | -8.879  | 0.003939 |
| 226863_at    | FAM110C: family with sequence similarity 110, member C                                | AI674565  | 642273 Hs.8379.0   | -2.42 | -9.89   | 0.00063  |
| 206673_at    | GPR176: G protein-coupled receptor 176                                                | NM_007223 | 11245 g6005771     | -2.43 | -6.91   | 0.002324 |
| 1554887_at   | Hs2.375106.1                                                                          | BC032716  | Hs2.375106.1       | -2.66 | -8.714  | 0.001211 |
| 209496_at    | RARRES2: retinoic acid receptor responder (tazarotene induced) 2                      | BC000069  | 5919 g12652642     | -2.85 | -9.965  | 0.001791 |
| 202771_at    | FAM38A: family with sequence similarity 38, member A                                  | NM_014745 | 9780 g7662013      | -2.91 | -9.669  | 0.001187 |
| 222033_s_at  | FLT1: Fms-related tyrosine kinase 1 (vascular endothelial growth factor/vascular perr | AA058828  | 2321 Hs.138671.2   | -2.94 | -11.662 | 0.000765 |
| 216915_s_at  | PTPN12: protein tyrosine phosphatase, non-receptor type 12                            | SP69182   | 5782 Hs.62.1       | -5.43 | -6.742  | 0.005342 |

170 genes satisfied the comparison filtering criteria
